# Supplementary material for: Role of MXRA8 in Ross River Virus Disease Pathogenesis
Source: PubMed Central journal article supplement (PMC10128017; doi:10.1128/mbio.00588-23), 2023-04-10

**A**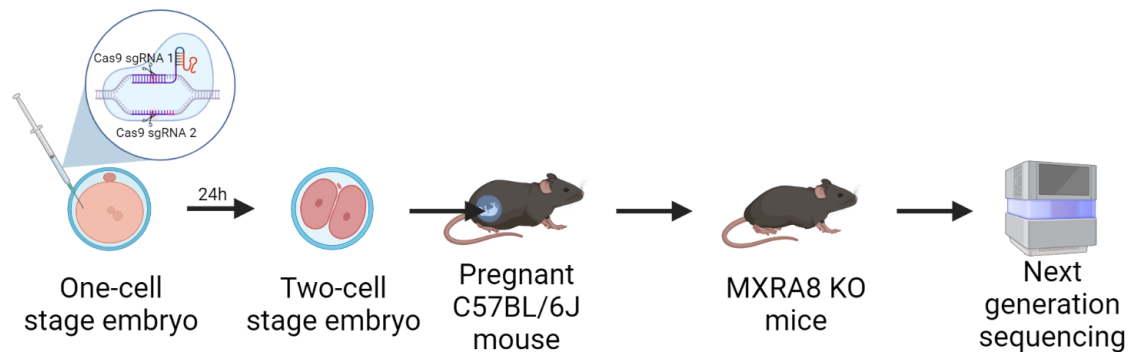**B**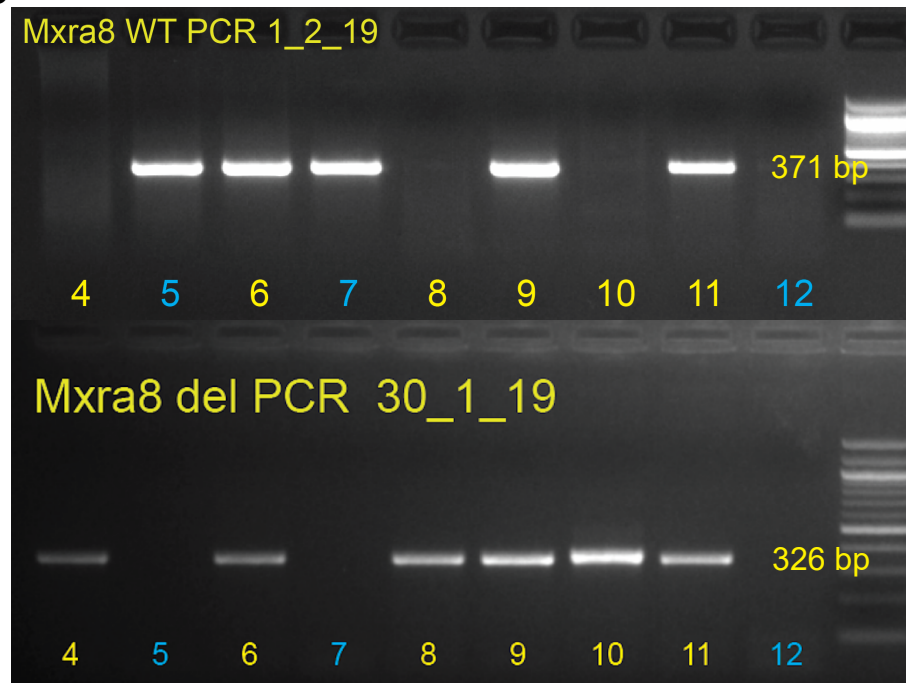**C**

|     |                                                                   |
|-----|-------------------------------------------------------------------|
| ref | GGAGGAGGGCAGACTTCTGCTATCCATCGTGACGAGCAAAGTCCCTCGTGGCCTCTTACTGCTAG |
| #4  | GGAGGAGGGCAGACTTCTGCTA-----TCCATCGTGAACCTCTTACTGCTAG              |
| #4  | GGAGGAGGGCAGACTTCTGCTA-----GTCCCTCGTGGCCTCTTACTGCTAG              |
| #6  | GGAGGAGGGCAGACTTCTGCTA-----TCCATCGTGAACCTCTTACTGCTAG              |
| #8  | GGAGGAGGGCAGACTTCTGCTA-----TCCCTCGTGGCCTCTTACTGCTAG               |
| #9  | GGAGGAGGGCAGACTTCTGCTA-----TCCCTCGTGGCCTCTTACTGCTAG               |
| #10 | GGAGGAGGGCAGACTTCTGCTA-----TCCCTCGTGGCCTCTTACTGCTAG               |
| #10 | GGAGGAGGGCAGACTTCTGCTATCCATCGTGACGAGCAAAGTCCCTCGTGGCCTCTTACTGCTAG |
| #11 | GGAGGAGGGCAGACTTCTGCTA-----TCCATCGTGGCCTCTTACTGCTAG               |

**D**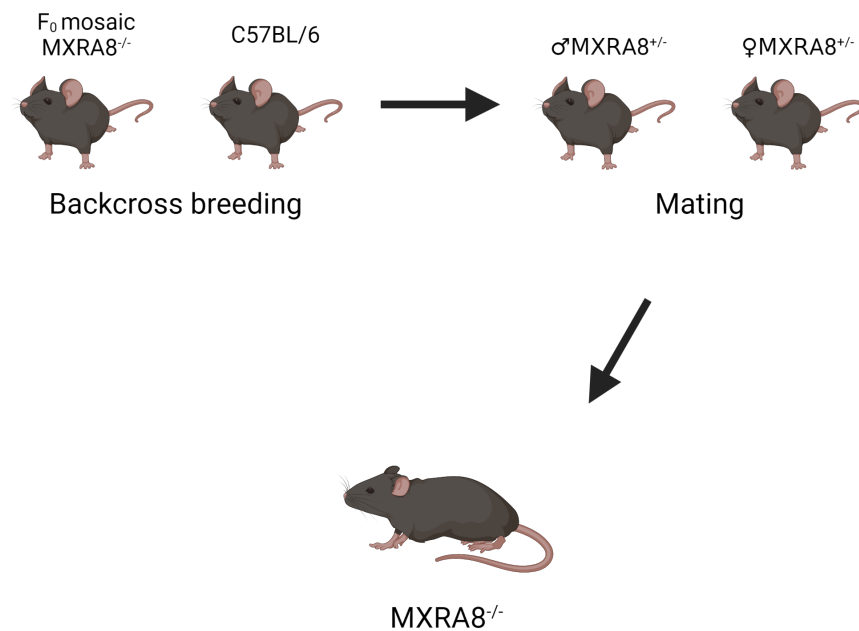

Supplement: mbio.00588-23-s0001.pdf [file mbio.00588-23-s0001.pdf]
