# Supplementary material for: Role of MXRA8 in Ross River Virus Disease Pathogenesis
Source: PubMed Central journal article supplement (PMC10128017; doi:10.1128/mbio.00588-23), 2023-04-10

# Day 10 Ankles

## A WT PBS

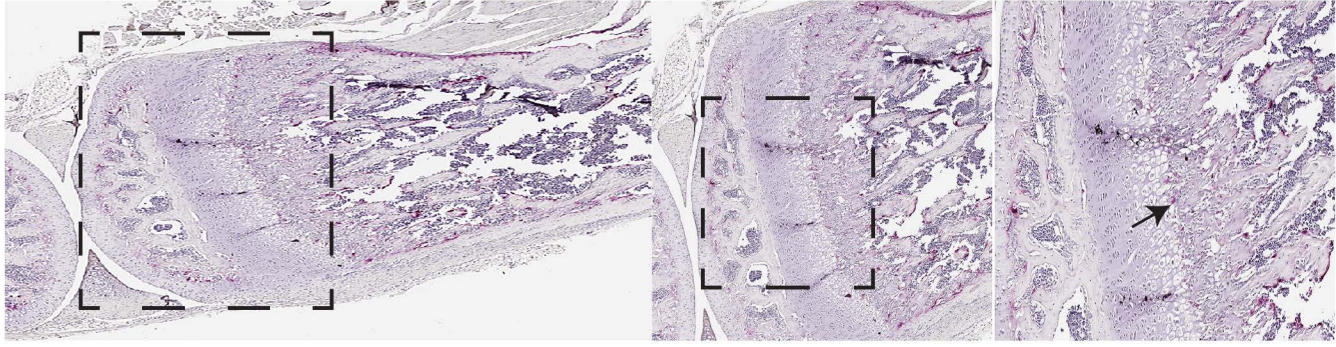

## B MXRA8<sup>-/-</sup> PBS

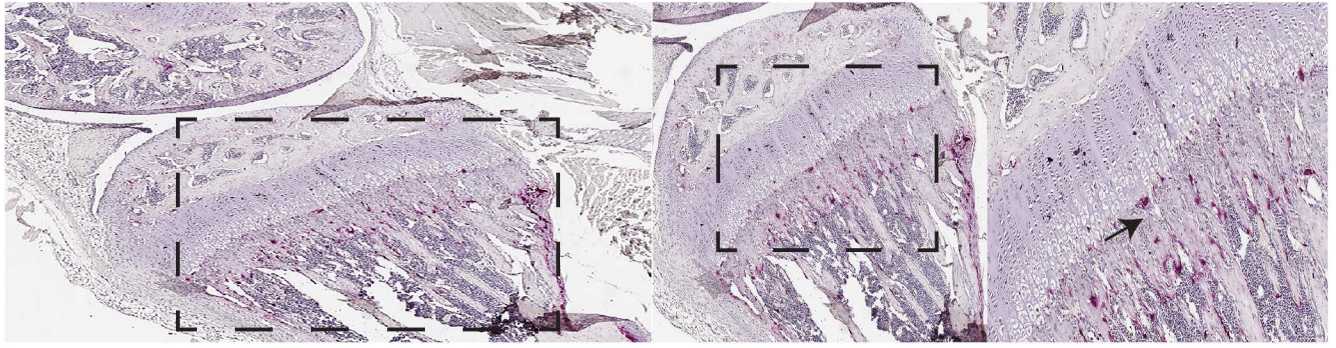

## C WT RRV

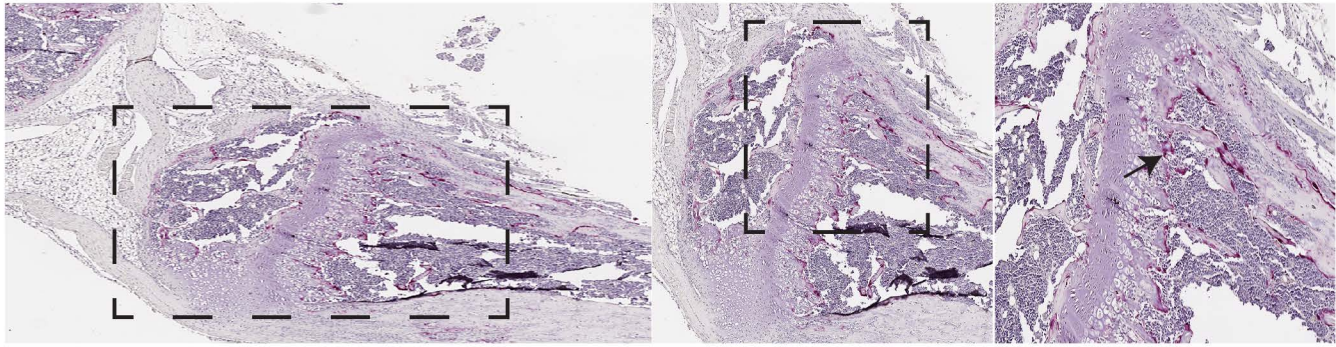

## D MXRA8<sup>-/-</sup> RRV

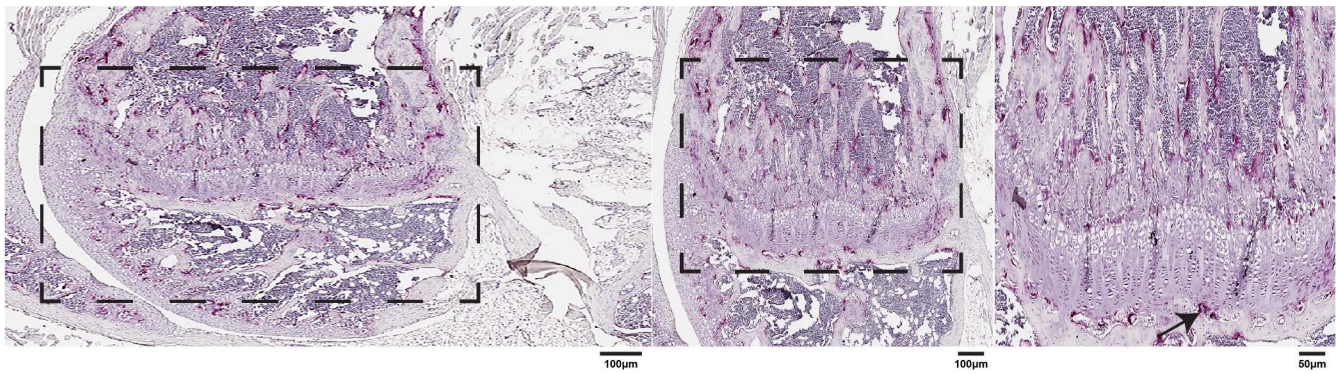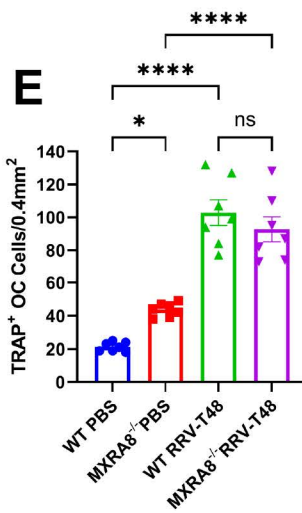

Supplement: mbio.00588-23-s0003.pdf [file mbio.00588-23-s0003.pdf]
