# Supplementary material for: Role of MXRA8 in Ross River Virus Disease Pathogenesis
Source: PubMed Central journal article supplement (PMC10128017; doi:10.1128/mbio.00588-23), 2023-04-10

# DLN - Lymphocytes

**A**

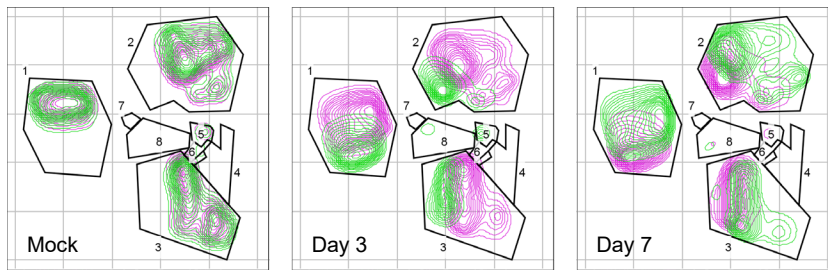

- 1. B cells
  - 2. CD4 T cells
  - 3. CD8 T cells
  - 4.  $\gamma\delta$  T cells
  - 5. NK cells
  - 6. NK T cells
  - 7. Neutrophils
  - 8. Other Myeloid
- WT  
- MXRA8 KO

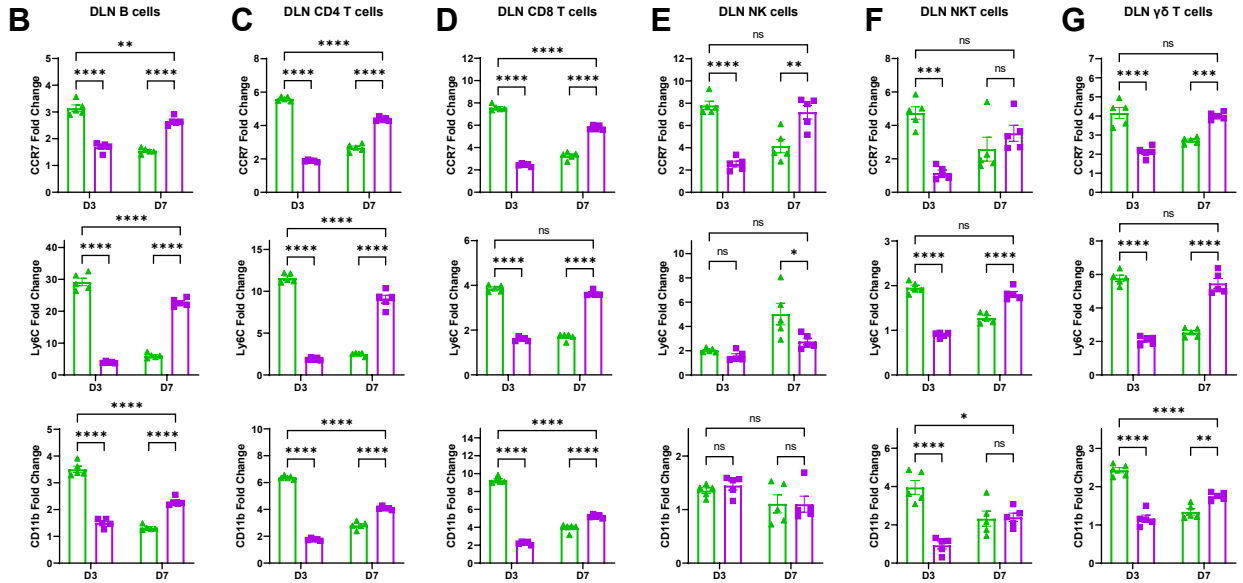

# DLN - Myeloid Cells

**H**

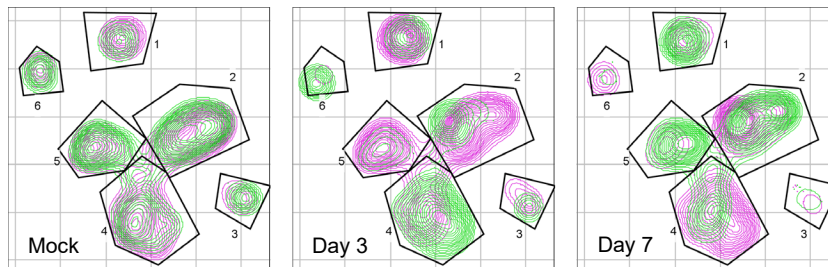

- 1. Neutrophils
  - 2. Monocytes/Macrophages
  - 3. Eosinophils
  - 4. cDC
  - 5. pDC
  - 6. CD3+
- WT  
- MXRA8 KO

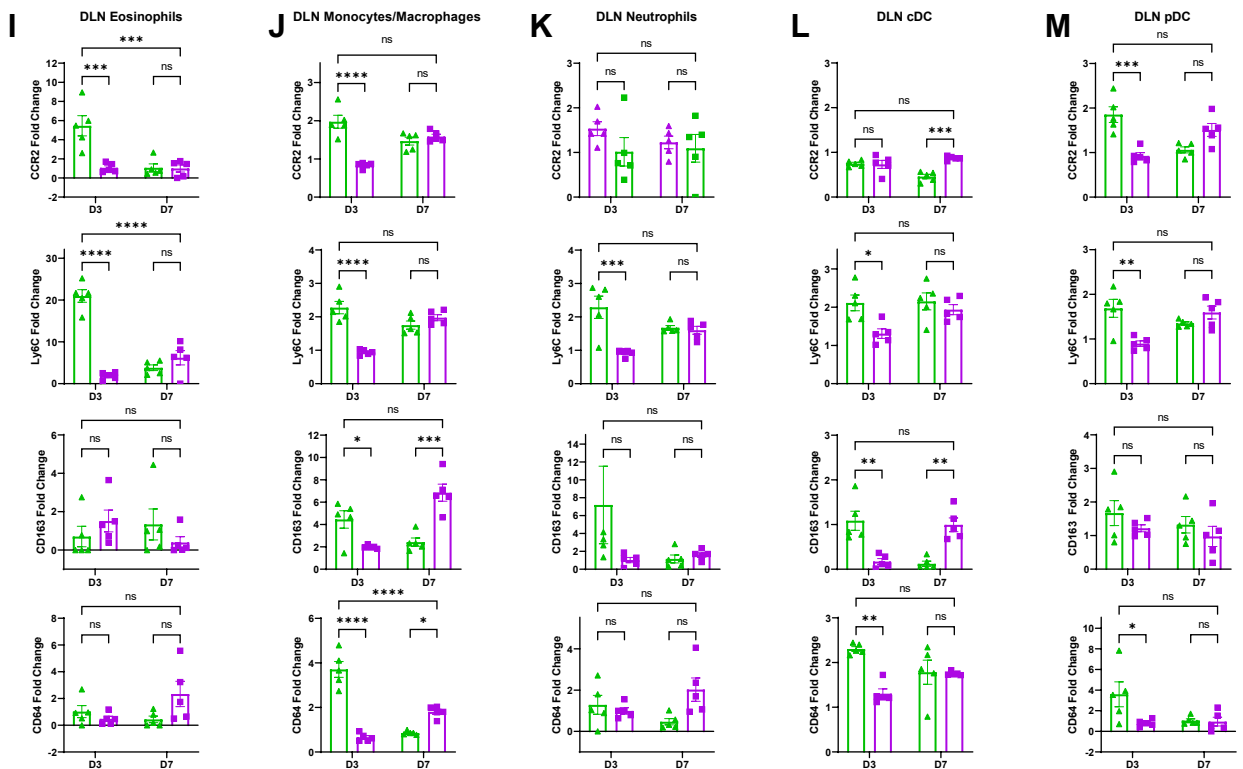

Supplement: mbio.00588-23-s0004.pdf [file mbio.00588-23-s0004.pdf]
