# Supplementary material for: Role of MXRA8 in Ross River Virus Disease Pathogenesis
Source: PubMed Central journal article supplement (PMC10128017; doi:10.1128/mbio.00588-23), 2023-04-10

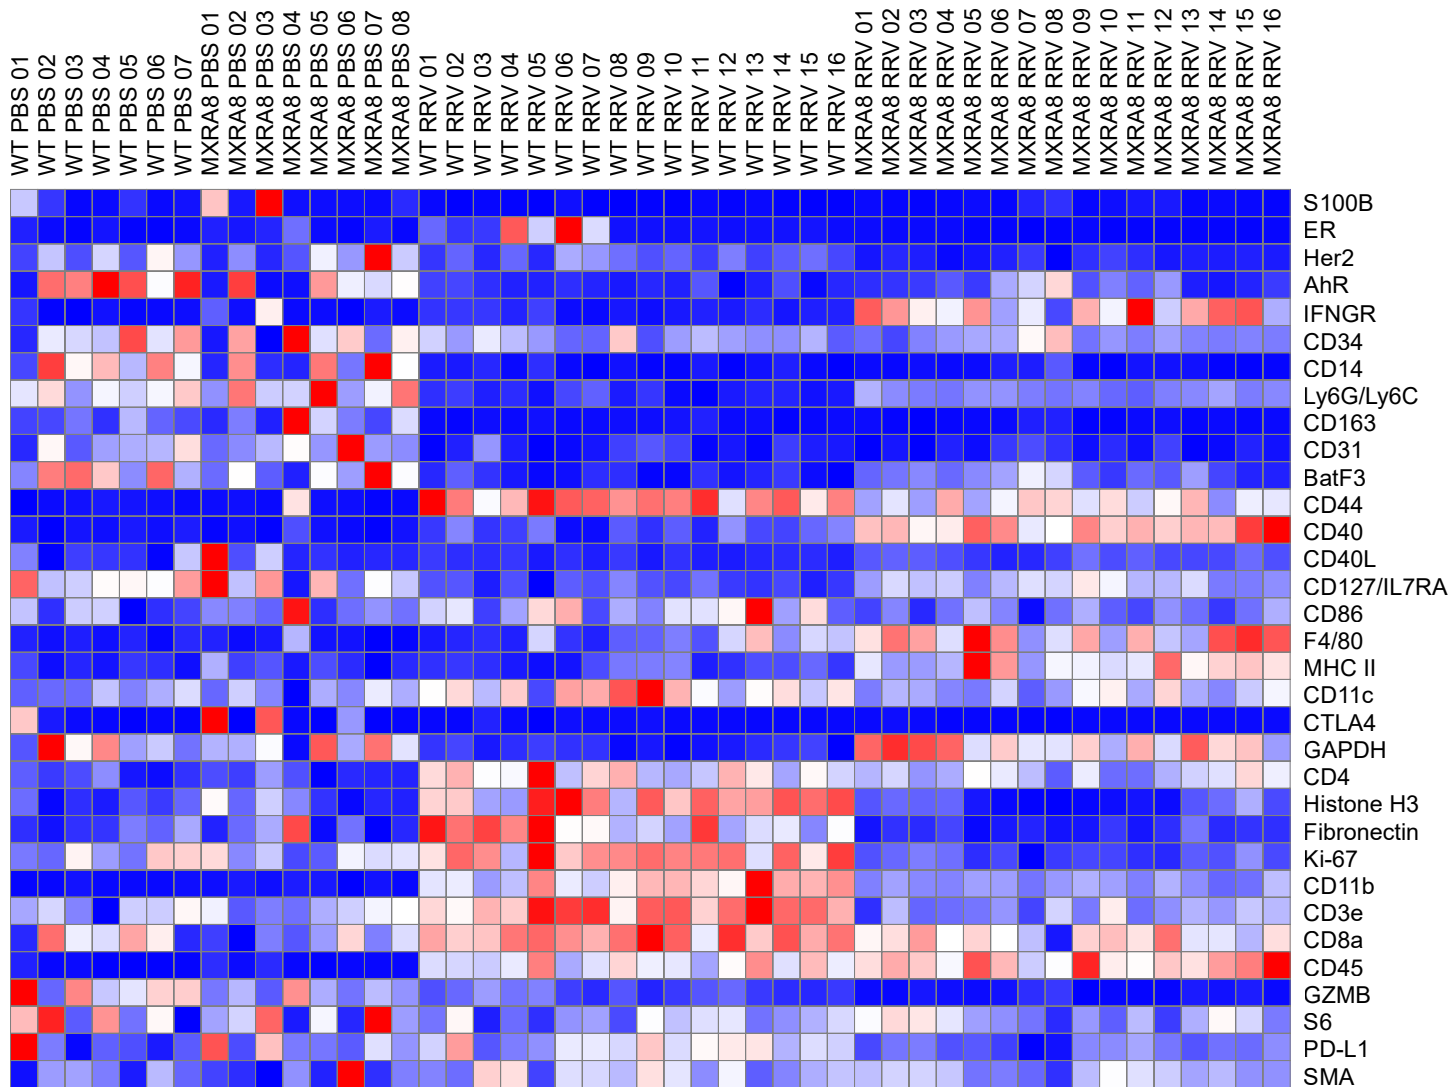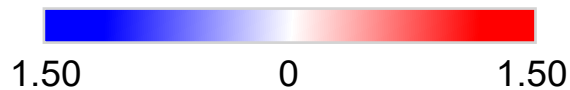

Supplement: mbio.00588-23-s0007.pdf [file mbio.00588-23-s0007.pdf]
